# Supplementary material
Source: publisher figshare collection journal article supplement (https://acs.figshare.com/ndownloader/files/5828412)
Supplement: Supplementary file 1 [file 5828412]

# **A Facile Highly Regio- and Stereo-selective Preparation of *N*-Tosyl Allylic Amines from Allylic Alcohols and Tosyl Isocyanate via Palladium(II)-Catalyzed Aminopalladation- $\beta$ -Heteroatom Elimination**

**Aiwen Lei and Xiyan Lu\***

*Laboratory of Organometallic Chemistry, Shanghai Institute of Organic Chemistry, Chinese Academy of Sciences, 354 Fenglin Lu, Shanghai, 200032, China*

*xylylu@pub.sioc.ac.cn*

## **General procedure for the synthesis of *N*-tosyl Allylic amines from allylic *N*-tosyl carbamates**

Allylic *N*-tosyl carbamate (1.0 mmol) was reacted with Pd(OAc)<sub>2</sub> (0.05 mmol) and LiBr (4.0 mmol) in DMF (5 mL) at rt or 100<sup>o</sup>C. After the reaction was complete as monitored by TLC, diethyl ether (100 mL) was added and the organic layer was washed successively with H<sub>2</sub>O (3 X 20 mL) and brine (3 X 20 mL), dried and concentrated. The crude product was purified by column chromatography on silica gel to give the product.

## **General procedure for the synthesis of Allylic sulfonamides from allylic alcohol**

Allylic alcohol (1.0 mmol) was reacted with TsNCO (1.1 mmol) in THF (5mL) for 10 min at rt under N<sub>2</sub>; the THF solvent was removed and the residue was dissolved in DMF (5 mL), then Pd(OAc)<sub>2</sub> (0.05 mmol) and LiBr (4.0 mmol) were added and the reaction was stirred at rt or 100<sup>o</sup>C. After the reaction was complete as monitored by TLC, diethyl ether (100 mL) was added and the organic layer was washed successively with H<sub>2</sub>O (3 X 20 mL) and brine (3 X 20 mL), dried and concentrated. The crude product was purified by column chromatography on silica gel to give product.

**3a:**  $^1\text{H}$  NMR (300MHz,  $\text{CDCl}_3$ )  $\delta$  7.70 (d,  $J = 8.3\text{Hz}$ , 2H), 7.24 (d,  $J = 8.3\text{Hz}$ , 2H), 5.65- 5.59 (m, 1H), 5.12-4.98 (m, 2H), 4.93 (br, 1H), 3.52-3.47 (m, 2H), 2.35 (s, 3H); IR (neat ): 3250, 1596, 1494, 1425, 1331, 1321, 1161  $\text{cm}^{-1}$ ; MS m/e: 211 ( $\text{M}^+$  ), 149, 139, 120, 92, 91, 65, 56.

**3b:**  $^1\text{H}$  NMR (300MHz,  $\text{CDCl}_3$ )  $\delta$  7.74 (d,  $J = 8.3\text{Hz}$ , 2H), 7.27 (d,  $J = 8.3\text{Hz}$ , 2H), 5.65- 5.56 (m, 1H), 5.06-4.91 (m, 3H), 3.89-3.83 (m, 1H), 2.35 (s, 3H), 1.14 (d,  $J = 6.8\text{Hz}$ , 3H); IR (neat ): 3278, 2980, 1598, 1428, 1328, 1159, 1093  $\text{cm}^{-1}$ ; MS m/e: 226 ( $\text{M}^+$  ), 210, 198, 172, 155, 139, 91, 65

**3c:**  $^1\text{H}$  NMR (300MHz,  $\text{CDCl}_3$ )  $\delta$  7.67 (d,  $J = 8.3\text{Hz}$ , 2H), 7.20 (d,  $J = 8.3\text{Hz}$ , 2H), 5.50- 5.42 (m, 1H), 4.95-4.86 (m, 2H), 4.46 (d,  $J = 7.7\text{Hz}$ , 1H), 3.72-3.63 (m, 1H), 2.35 (s, 3H), 1.37-1.35 (m, 2H), 1.19-1.12 (m, 4H), 0.75 (t,  $J = 6.9\text{Hz}$ , 3H); IR (neat ): 3279, 2998, 2922, 1599, 1496, 1429, 1328, 1306, 1289, 1162, 1095, 1042, 923, 815, 668, 577, 550  $\text{cm}^{-1}$ ; MS m/e: 268 ( $\text{M}^+ + 1$ ), 210, 184, 172, 155, 112, 97, 91, 65.

**3d:**  $^1\text{H}$  NMR (300MHz,  $\text{CDCl}_3$ )  $\delta$  7.69 (d,  $J = 8.3\text{Hz}$ , 2H), 7.22-7.11 (m, 7H), 6.35 (d,  $J = 15.9$ , 1H), 5.93 (td,  $J = 6.3, 15.9\text{Hz}$ , 1H), 4.73 (t,  $J = 6.1\text{Hz}$ , 1H), 3.66 (ddd,  $J = 1.4, 6.3, 6.1\text{Hz}$ , 2H), 2.33 (s, 3H); IR (neat ) 3283, 1597, 1494, 1446, 1421, 1307, 1292, 1162, 1154, 1092, 1047, 817, 747, 689, 670, 59, 547  $\text{cm}^{-1}$ ; MS m/e: 287 ( $\text{M}^+$  ), 184, 155, 132, 130, 117, 105, 91, 77, 65.

**3e:**  $^1\text{H}$  NMR (300MHz,  $\text{CDCl}_3$ )  $\delta$  7.69 (d,  $J = 8.2\text{Hz}$ , 2H), 7.23 (d,  $J = 8.2\text{Hz}$ , 2H), 5.53-5.44 (m, 1H), 5.30-5.21 (m, 1H), 4.48 (br, 1H), 3.43 (t,  $J = 6.2\text{Hz}$ , 2H), 2.35 (s, 3H), 1.53 (dd,  $J = 1.1, 6.5\text{Hz}$ , 3H); IR (neat ): 3250, 3044, 2947, 2922, 2856, 1677, 1650, 1597, 1495, 1421, 1342, 1324, 1290, 1161, 1093, 1048, 971, 933, 869, 811, 708, 670, 552, 520  $\text{cm}^{-1}$ ; MS m/e: 225 ( $\text{M}^+$  ), 210, 184, 155, 139, 91, 70, 65.

**3f:**  $^1\text{H}$  NMR (300MHz,  $\text{CDCl}_3$ )  $\delta$  7.70 (d,  $J = 8.3\text{Hz}$ , 2H), 7.23 (d,  $J = 8.3\text{Hz}$ , 2H), 5.50- 5.40 (m, 1H), 5.26-5.16 (m, 1H), 4.83 (br, 1H), 3.43 (t,  $J = 6.2$ , 2H), 2.35 (s, 3H), 1.83-1.79 (m, 2H), 1.17-1.13 (m, 6H), 0.77 (t,  $J = 7.0$ , 3H); IR (neat ): 3282, 2926, 2956, 2858, 1598, 1428, 1327, 1160  $\text{cm}^{-1}$ ; MS m/e: 281 ( $\text{M}^+$  ), 266, 238, 210, 184, 155, 126, 110, 91, 56.

**3g:**  $^1\text{H}$  NMR (300MHz,  $\text{CDCl}_3$ )  $\delta$  7.66 (d,  $J = 8.3\text{Hz}$ , 2H), 7.28-7.14 (m, 12H), 6.36 (d,  $J = 15.8$ , 1H), 6.07 (dd,  $J = 6.7$ , 15.8Hz, 1H), 5.12 (dd,  $J = 6.7$ , 6.9Hz, 1H), 4.89 (d,  $J = 6.9\text{Hz}$ , 1H), 2.33 (s, 3H); IR (neat): 3271, 3062, 3030, 2958, 2926, 1599, 1495, 1455, 1327, 1160, 1093, 968, 747, 699, 564  $\text{cm}^{-1}$ ; MS m/e: 363 ( $\text{M}^+$ ), 208, 206, 193, 178, 155, 130, 115, 104, 91.

**3h:**  $^1\text{H}$  NMR (300MHz,  $\text{CDCl}_3$ )  $\delta$  7.68 (d,  $J = 8.2\text{Hz}$ , 2H), 7.21 (d,  $J = 8.2\text{Hz}$ , 2H), 4.99-4.94 (m, 1H), 4.58 (br, 1H), 3.44 (t,  $J = 6.5\text{Hz}$ , 2H), 2.34 (s, 3H), 1.53 (s, 3H), 1.44 (s, 3H); IR (neat): 3277, 1630, 1599, 1430, 1328, 1160, 1093, 1051, 908, 815, 660, 554  $\text{cm}^{-1}$ ; MS m/e: 239 ( $\text{M}^+$ ), 224, 184, 171, 155, 91, 84, 65.

**14:**  $^1\text{H}$  NMR (300MHz,  $\text{CDCl}_3$ )  $\delta$  7.69 (d,  $J = 8.5\text{Hz}$ , 2H), 7.23 (d,  $J = 8.5\text{Hz}$ , 2H), 6.18-5.98 (m, 2H), 5.51-5.42 (m, 1H), 5.11- 4.99 (m, 2H), 4.57 (br, 1H), 3.55 (t,  $J = 6.3\text{Hz}$ , 2H), 2.35 (s, 3H); IR (neat): 3265, 3093, 2858, 1656, 1604, 1496, 1451, 1422, 1325, 1289, 1162, 1093, 1014, 977, 920, 873, 814, 707, 663, 610, 550, 503  $\text{cm}^{-1}$ ; MS m/e: 237 ( $\text{M}^+$ ), 210, 184, 172, 155, 139, 91, 82, 65.

### The reaction of **1b** under $\text{Pd}(\text{OAc})_2/\text{PPh}_3$

**1b** (1.0 mmol) was reacted with  $\text{Pd}(\text{OAc})_2$  (0.05 mmol) and  $\text{PPh}_3$  (0.2 mmol) in DMF (5 mL) at rt under Ar. After the reaction was complete as monitored by TLC, diethyl ether (100 mL) was added and the organic layer was washed successively with  $\text{H}_2\text{O}$  (3 X 20 mL) and brine (3 X 20 mL), dried and concentrated. The crude product was purified by column chromatography on silica gel to give products.

**(3b, (E)-3e):**  $^1\text{H}$  NMR (300MHz,  $\text{CDCl}_3$ )  $\delta$  7.80-7.71 (m, 2H), 7.33-7.27 (m, 2H), 5.65- 5.54 (m, 1H), 5.36-5.30 (m, 0.56H), 5.09-4.95 (m, 1.32H), 4.84(br, 0.56H), 3.53-3.48( m, 1.56H), 2.44( s, 3H), 1.60 (dd,  $J = 6.5$ , 1.2Hz, 1.68H), 1.19 (d,  $J = 6.9\text{Hz}$ , 1.32H);

As compared with standard sample, the experiments of HPLC showed that the area percent of **3b** and (*E*)-**3e** was 37% and 51%, respectively.
